# Supplementary material
Source: Royal Society of Chemistry journal article supplement (https://www.rsc.org/suppdata/dt/1999/1717/901384i.doc)
Supplement: Supplementary file 1 [file 901384i.doc]

Table S1. Optimized geometries a for [Re(NO)2(PH3)2L]n+ model complexes. Angle P-Re-P fixed at 170.0°.

|  | L | Re-L | Re-P | Re-N | N-O | Re-N-O | N-Re-N | other | E b |
| --- | --- | --- | --- | --- | --- | --- | --- | --- | --- |
| **1+** | - | - | 246.4 | 180.2 | 118.4 | 161.2 | 117.7 |  | 2 |
| **2** | H- | 172.0 | 240.5 | 182.6 | 120.4 | 172.3 | 126.5 |  | 11 |
| **3+** | CO | 200.9 | 247.0 | 184.0 | 117.6 | 175.3 | 125.2 | C-O 115.4 | 1 |
| **4+** | CN-CH3 | 206.8 | 245.4 | 183.0 | 118.3 | 172.6 | 122.3 | C-N 117.3 | 4 |
| **5+** | PH3 | 249.5 | 245.3 | 182.4 | 118.3 | 170.7 | 121.5 | H-P-H 98.2 | 2 |
| **6** | CN- | 210.4 | 243.0 | 182.1 | 119.9 | 171.0 | 121.2 | C-N 117.6 | <1 |
| **7+** | NC-CH3 | 214.3 | 245.5 | 181.5 | 118.9 | 168.3 | 116.8 | N-C 116.3 | <1 |
| **8** | Cl- | 246.9 | 243.5 | 180.7 | 120.4 | 166.5 | 114.8 |  | 3 |

a Distances in pm, angles in degree. b Energy difference (in kJ mol-1) compared to the fully optimized structure.

Table S2. Optimized geometries a for [Re(NO)2(PH3)2L]n complexes. Angle P-Re-P fixed at 150.0°.

|  | L | Re-L | Re-P | Re-N | N-O | Re-N-O | N-Re-N | other | E b |
| --- | --- | --- | --- | --- | --- | --- | --- | --- | --- |
| **1+** | - | - | 244.6 | 180.8 | 118.3 | 162.2 | 119.8 |  | 3 |
| **2** | H- | 172.4 | 238.9 | 182.4 | 120.4 | 173.9 | 126.5 |  | <1 |
| **3+** | CO | 199.5 | 247.2 | 184.5 | 117.5 | 177.4 | 125.1 | C-O 115.7 | 30 |
| **4+** | CN-CH3 | 206.7 | 245.2 | 183.1 | 118.2 | 174.9 | 123.1 | C-N 117.5 | 27 |
| **5+** | PH3 | 252.0 | 244.8 | 182.3 | 118.1 | 171.4 | 120.7 | H-P-H 97.3 | 38 |
| **6** | CN- | 211.5 | 242.0 | 182.2 | 119.8 | 173.3 | 124.2 | C-N 117.5 | 6 |
| **7+** | NC-CH3 | 218.5 | 245.7 | 181.2 | 118.5 | 168.9 | 117.4 | N-C 116.5 | 27 |
| **8** | Cl- | 254.4 | 242.0 | 180.5 | 120.2 | 167.0 | 115.5 |  | 5 |

a Distances in pm, angles in degree. b Energy difference (in kJ mol-1) compared to the fully optimized structure.

Table S3. Eigenvalues of the three highest occupied orbitals of the complexes **2**, **3+** and **8** at different N-Re-N angles.

|  | L | P-Re-P a | sym. | N-Re-N a / orbital eigenvalues b | | | | | | |
| --- | --- | --- | --- | --- | --- | --- | --- | --- | --- | --- |
|  |  |  |  | 105 | 110 | 115 | 120 | 125 | 130 | 135 |
|  |  |  | 1b1 | -6.08 | -6.03 | -5.97 | -5.91 | -5.85 | -5.79 | -5.73 |
| **2** | H- | 151.7 | 1a1 | -5.36 | -5.29 | -5.21 | -5.13 | -5.05 | -4.97 | -4.90 |
|  |  |  | 1b2 | -4.86 | -4.95 | -5.05 | -5.15 | -5.24 | -5.35 | -5.45 |
|  |  |  | 1b1 | -11.42 | -11.38 | -11.33 | -11.28 | -11.23 | -11.18 | -11.13 |
| **3+** | CO | 174.0 | 1a1 | -10.78 | -10.68 | -10.60 | -10.50 | -10.40 | -10.30 | -10.21 |
|  |  |  | 1b2 | -10.14 | -10.26 | -10.36 | -10.48 | -10.59 | -10.71 | -10.83 |
|  |  |  | 1b1 | -6.14 | -6.10 | -6.05 | -6.00 | -5.94 | -5.88 | -5.81 |
| **8** | Cl- | 161.2 | 1a1 | -5.97 | -5.90 | -5.82 | -5.73 | -5.65 | -5.56 | -5.47 |
|  |  |  | 1b2 | -5.00 | -5.09 | -5.17 | -5.26 | -5.35 | -5.42 | -5.50 |

a Angles in degree. b Eigenvalues in eV.
